# Supplementary material for: Macular Ganglion Cell Inner Plexiform Layer Thickness in Glaucomatous Eyes with Localized Retinal Nerve Fiber Layer Defects
Source: PLoS One. 2016 Aug 18;11(8):e0160549. doi: 10.1371/journal.pone.0160549 (PMC4990273; doi:10.1371/journal.pone.0160549)
Supplement: S1 Table — (XLSX) [file pone.0160549.s001.xlsx]

## Sheet: Sheet1
maskedid	eye	opticdisc_clockhour_1	opticdisc_clockhour_2	opticdisc_clockhour_3	opticdisc_clockhour_4	opticdisc_clockhour_5	opticdisc_clockhour_6	opticdisc_clockhour_7	opticdisc_clockhour_8	opticdisc_clockhour_9	opticdisc_clockhour_10	opticdisc_clockhour_11	opticdisc_clockhour_12	supRNFLdefect	infRNFLdefect	clock1	clock2	clock3	clock4	clock5	clock6	clock7	clock8	clock9	clock10	clock11	clock12	gender	racial	gca_gc_average	gca_gc_minimum	gca_gc_tempsup	gca_gc_sup	gca_gc_nassup	gca_gc_nasinf	gca_gc_inf	gca_gc_tempinf	opticdisc_averagethickness	glaucoma
AL0333	OD	71	80	56	61	78	96	79	43	45	57	102	89	0	1	0	0	0	0	0	0	1	0	0	0	0	0	F	White	28	20	34	26	28	24	22	37	71	1
AL0339	OD	154	79	65	58	137	175	102	59	41	63	81	161	0	0	0	0	0	0	0	0	0	0	0	0	0	0	F	Black or African American	75	70	74	75	71	76	78	75	98	0
AL0348	OD	86	83	83	82	97	57	76	49	42	64	87	87	0	0	0	0	0	0	0	0	0	0	0	0	0	0	M	White	67	60	75	70	64	66	65	63	74	0.5
AL0364	OS	133	111	57	96	127	147	83	46	40	57	99	144	0	0	0	0	0	0	0	0	0	0	0	0	0	0	M	White	78	77	79	81	77	74	76	80	95	0
AL0376	OD	76	71	53	66	85	105	113	56	46	52	107	92	1	1	0	0	0	0	0	0	1	1	1	1	0	0	F	Black or African American	69	54	61	56	65	76	76	78	77	1
AL0377	OD	124	106	60	71	115	117	121	61	38	63	92	141	0	0	0	0	0	0	0	0	0	0	0	0	0	0	F	Black or African American	83	77	77	87	88	88	78	78	92	0
AL0409	OS	112	123	68	84	121	142	92	41	50	69	104	131	0	0	0	0	0	0	0	0	0	0	0	0	0	0	F	Black or African American	78	77	78	82	80	77	74	78	95	0
AL0429	OD	90	77	55	68	90	102	152	84	56	92	146	99	0	0	0	0	0	0	0	0	0	0	0	0	0	0	F	Black or African American	92	90	92	92	93	94	92	89	93	0
AL0439	OD	90	94	62	68	90	118	145	66	45	51	74	107	0	0	0	0	0	0	0	0	0	0	0	0	0	0	M	Black or African American	80	72	75	71	83	87	87	80	84	0.5
AL0450	OD	82	103	63	66	118	168	142	58	55	85	120	116	0	0	0	0	0	0	0	0	0	0	0	0	0	0	F	Black or African American	87	84	86	88	88	87	86	87	98	0
AL0455	OD	80	88	68	65	73	118	132	55	47	68	85	130	0	0	0	0	0	0	0	0	0	0	0	0	0	0	F	Black or African American	78	77	79	79	80	77	76	80	84	0
AL0463	OD	85	97	76	75	118	146	160	70	44	67	117	142	0	0	0	0	0	0	0	0	0	0	0	0	0	0	F	Black or African American	83	80	80	82	81	86	83	84	100	0
AL0486	OD	96	120	76	77	100	133	163	65	49	78	123	105	0	0	0	0	0	0	0	0	0	0	0	0	0	0	F	Black or African American	94	93	92	93	95	94	94	95	99	0
AL0488	OD	67	71	56	61	83	124	102	39	31	38	53	39	0	0	0	0	0	0	0	0	0	0	0	0	0	0	F	Black or African American	65	49	53	52	66	72	74	73	64	0.5
AL0491	OD	100	65	53	55	77	90	68	39	38	42	70	100	0	0	0	0	0	0	0	0	0	0	0	0	0	0	F	Black or African American	70	64	63	69	74	72	71	68	66	0.5
AL0537	OD	118	90	56	65	157	183	121	53	42	62	99	104	0	0	0	0	0	0	0	0	0	0	0	0	0	0	F	Black or African American	78	73	74	76	79	82	80	80	96	0
AL0556	OD	95	92	67	83	141	150	95	37	42	70	95	117	0	0	0	0	0	0	0	0	0	0	0	0	0	0	F	Black or African American	84	77	84	87	86	83	79	84	90	0.5
AL0559	OD	90	87	58	64	83	108	117	63	47	76	108	60	0	0	0	0	0	0	0	0	0	0	0	0	0	0	F	White	80	81	79	81	80	78	79	82	80	0
AL0583	OD	71	79	56	59	99	134	135	44	29	30	64	57	0	0	0	0	0	0	0	0	0	0	0	0	0	0	F	Black or African American	65	53	60	56	58	68	72	74	71	0.5
AL0584	OD	85	52	38	42	48	60	44	32	34	43	72	76	1	1	0	0	0	0	0	1	0	0	0	0	1	0	F	Black or African American	60	50	65	60	65	55	53	61	52	1
AL0601	OS	108	77	52	51	92	105	110	42	36	40	45	113	1	0	0	0	0	0	0	0	0	0	0	0	1	0	M	Black or African American	71	64	64	69	73	74	72	74	73	1
AL0613	OD	71	60	54	69	80	86	98	71	44	52	41	63	0	0	0	0	0	0	0	0	0	0	0	0	0	0	F	Black or African American	72	57	61	63	77	79	77	73	66	0.5
AL0617	OD	82	78	47	52	103	125	93	54	39	65	121	84	0	0	0	0	0	0	0	0	0	0	0	0	0	0	F	White	80	78	79	81	80	80	78	79	79	0
AL0625	OD	100	74	52	62	89	78	49	47	43	64	90	118	0	1	0	0	0	0	0	0	1	0	0	0	0	0	M	White	72	50	75	84	86	80	58	52	72	1
AL0670	OS	73	75	62	50	57	75	46	34	47	44	75	83	1	1	0	0	0	0	0	0	1	0	0	1	0	0	F	Black or African American	60	45	57	69	75	59	51	46	60	1
AL0672	OD	103	73	56	72	88	108	121	51	47	72	95	149	0	0	0	0	0	0	0	0	0	0	0	0	0	0	F	Black or African American	78	74	80	83	79	78	74	77	86	0.5
AL0673	OS	94	89	67	68	73	108	116	52	46	73	86	111	0	0	0	0	0	0	0	0	0	0	0	0	0	0	F	Black or African American	76	72	72	74	76	80	80	77	82	0
AL0681	OD	99	83	71	75	73	127	94	50	49	75	97	84	0	0	0	0	0	0	0	0	0	0	0	0	0	0	M	Black or African American	79	78	77	80	83	81	77	77	81	0.5
AL0692	OD	76	62	55	55	64	79	139	87	65	90	133	77	0	0	0	0	0	0	0	0	0	0	0	0	0	0	F	White	84	83	81	85	81	86	83	86	82	0.5
AL0699	OD	127	84	45	73	104	116	124	52	34	55	88	166	0	0	0	0	0	0	0	0	0	0	0	0	0	0	M	Black or African American	78	73	73	77	81	82	79	76	89	0
AL0707	OD	85	71	48	57	78	107	172	85	56	99	168	96	0	0	0	0	0	0	0	0	0	0	0	0	0	0	F	White	88	86	87	87	91	89	86	87	93	0
AL0719	OS	85	79	59	75	102	59	42	47	53	77	115	91	0	1	0	0	0	0	0	1	1	0	0	0	0	0	F	Black or African American	71	51	76	81	83	75	61	51	74	1
AL0769	OS	127	96	68	59	110	127	83	50	46	68	93	106	0	0	0	0	0	0	0	0	0	0	0	0	0	0	F	Black or African American	79	70	71	81	82	84	80	77	86	0
AL0775	OD	103	118	65	92	134	142	113	62	56	85	140	121	0	0	0	0	0	0	0	0	0	0	0	0	0	0	M	White	91	89	93	91	91	89	89	95	103	0
AL0813	OD	100	66	53	68	101	108	107	54	37	63	113	104	0	0	0	0	0	0	0	0	0	0	0	0	0	0	F	White	70	66	68	70	71	70	68	70	81	0.5
AL0815	OD	106	60	47	43	91	100	109	70	40	60	89	125	0	0	0	0	0	0	0	0	0	0	0	0	0	0	M	Black or African American	78	76	79	76	80	79	74	78	78	0
AL0818	OD	65	63	57	54	100	154	100	45	41	91	137	84	0	0	0	0	0	0	0	0	0	0	0	0	0	0	F	White	61	59	57	62	63	59	60	63	83	0
AL0830	OS	53	75	50	51	55	56	66	37	40	41	87	68	0	0	0	0	0	0	0	0	0	0	0	0	0	0	F	White	57	47	61	60	66	52	51	52	56	0.5
AL0844	OD	75	86	71	52	70	111	169	96	54	69	98	139	0	0	0	0	0	0	0	0	0	0	0	0	0	0	M	White	83	82	84	83	84	82	80	83	91	0
AL0850	OS	114	74	58	53	75	59	75	41	38	66	88	113	0	1	0	0	0	0	0	1	0	0	0	0	0	0	F	Black or African American	79	71	78	85	87	81	75	69	71	1
AL0853	OD	92	87	55	60	79	124	120	50	51	78	131	84	0	0	0	0	0	0	0	0	0	0	0	0	0	0	F	Black or African American	77	75	77	77	77	78	77	75	84	0
AL0897	OD	132	103	56	61	89	147	143	59	42	61	117	149	0	0	0	0	0	0	0	0	0	0	0	0	0	0	M	White	75	71	72	77	79	78	71	71	97	0
AL0917	OD	59	68	60	58	76	74	75	56	56	55	71	94	0	1	0	0	0	0	0	0	1	1	0	0	0	0	M	Black or African American	71	61	77	76	86	64	60	64	67	1
AL0927	OD	79	74	71	77	84	110	59	50	48	74	80	102	0	1	0	0	0	0	0	0	1	0	0	0	0	0	F	Black or African American	79	61	82	87	87	84	72	62	76	1
AL0939	OD	78	78	44	63	62	112	89	49	41	61	102	85	0	0	0	0	0	0	0	0	0	0	0	0	0	0	M	White	69	67	66	69	75	73	66	67	72	0.5
AL0969	OD	79	87	50	56	103	116	71	57	57	81	136	97	0	1	0	0	0	0	0	0	1	0	0	0	0	0	F	White	73	62	78	81	83	75	62	61	83	1
AL1005	OD	88	91	54	59	103	136	117	55	43	68	107	139	0	0	0	0	0	0	0	0	0	0	0	0	0	0	M	Black or African American	79	76	81	80	76	74	78	83	88	0
AL1016	OD	87	72	47	39	46	57	96	50	45	62	112	57	0	0	0	0	0	0	0	0	0	0	0	0	0	0	M	White	69	67	68	71	72	71	63	69	64	0.5
AL1036	OS	86	86	63	72	106	70	60	45	46	58	100	121	0	1	0	0	0	0	0	1	0	0	0	0	0	0	M	Black or African American	69	58	80	76	76	64	60	59	76	1
AL1091	OS	94	97	49	68	76	49	54	35	45	67	89	68	1	1	0	0	0	0	0	1	1	0	0	0	1	0	F	White	64	49	64	73	74	61	57	52	66	1
AL1094	OD	93	58	49	54	81	112	98	51	46	54	83	129	0	0	0	0	0	0	0	0	0	0	0	0	0	0	F	Black or African American	72	64	66	72	82	80	68	66	76	0.5
AL1106	OD	128	104	47	47	87	120	158	85	53	80	128	97	1	0	0	0	0	0	0	0	0	0	0	0	0	1	F	Black or African American	88	86	84	88	90	91	88	88	95	1
AL1121	OS	115	99	83	66	118	130	92	43	37	65	107	128	0	0	0	0	0	0	0	0	0	0	0	0	0	0	F	Black or African American	82	79	80	85	86	84	81	77	90	0
AL1187	OD	142	117	64	83	110	147	110	46	33	54	90	122	0	0	0	0	0	0	0	0	0	0	0	0	0	0	F	Black or African American	76	67	67	76	78	83	79	76	93	0
AL1204	OD	74	72	49	65	103	86	79	46	40	51	78	69	1	0	0	0	0	0	0	0	0	0	0	0	1	0	F	Black or African American	64	59	59	66	68	65	64	60	68	1
AL1207	OD	113	98	53	68	94	137	145	71	50	80	131	152	0	0	0	0	0	0	0	0	0	0	0	0	0	0	F	White	87	86	84	86	88	89	85	88	99	0
AL1220	OD	71	89	71	74	103	123	153	78	54	75	121	127	0	0	0	0	0	0	0	0	0	0	0	0	0	0	M	White	81	81	80	80	82	81	81	83	95	0
AL1228	OD	106	81	58	60	70	123	101	54	45	59	90	115	0	0	0	0	0	0	0	0	0	0	0	0	0	0	M	Black or African American	72	68	75	74	76	67	67	72	80	0.5
AL1231	OS	104	69	49	53	94	79	104	63	46	70	123	100	0	0	0	0	0	0	0	0	0	0	0	0	0	0	F	White	78	77	74	80	81	79	79	78	80	0.5
NY7230	OS	80	93	56	55	95	130	75	32	30	41	63	99	0	0	0	0	0	0	0	0	0	0	0	0	0	0	M	Black or African American	73	73	70	71	73	73	76	75	71	0
NY7236	OS	148	115	70	70	153	184	138	54	51	71	126	156	0	0	0	0	0	0	0	0	0	0	0	0	0	0	F	Black or African American	85	80	80	86	90	87	84	83	111	0.5
NY7245	OD	76	65	49	43	55	51	61	41	39	49	61	93	0	1	0	0	0	0	0	1	0	0	0	0	0	0	F	Black or African American	60	52	66	65	65	58	50	58	57	1
NY7269	OD	69	85	78	71	87	68	55	45	49	48	78	67	0	0	0	0	0	0	0	0	0	0	0	0	0	0	M	Black or African American	49	43	51	49	47	46	49	51	67	0.5
NY7275	OD	103	91	82	84	112	152	133	92	65	83	109	129	0	0	0	0	0	0	0	0	0	0	0	0	0	0	M	White	82	82	81	81	84	81	84	83	103	0
NY7276	OS	85	120	57	78	81	93	157	88	55	92	143	83	0	0	0	0	0	0	0	0	0	0	0	0	0	0	F	White	81	77	79	75	78	84	84	85	94	0.5
NY7293	OD	132	79	57	79	117	154	117	46	42	68	127	147	0	0	0	0	0	0	0	0	0	0	0	0	0	0	F	Black or African American	84	79	78	84	88	86	86	83	97	0
NY7297	OS	73	70	55	65	97	86	100	55	56	63	62	53	0	1	0	0	0	0	0	1	0	0	0	0	0	0	F	Black or African American	72	67	65	70	76	76	70	75	69	1
NY7300	OD	117	101	53	75	128	165	166	83	59	82	146	125	0	0	0	0	0	0	0	0	0	0	0	0	0	0	M	Black or African American	86	85	86	85	88	88	83	85	108	0
NY7308	OD	139	109	60	68	131	173	99	47	44	71	130	189	0	0	0	0	0	0	0	0	0	0	0	0	0	0	F	Black or African American	89	83	88	94	91	87	87	87	105	0
NY7322	OD	89	67	66	62	68	62	55	39	39	43	58	102	0	0	0	0	0	0	0	0	0	0	0	0	0	0	M	Black or African American	68	60	74	69	69	70	65	62	62	0.5
NY7325	OD	106	61	46	60	108	142	149	72	63	84	142	168	0	0	0	0	0	0	0	0	0	0	0	0	0	0	F	Black or African American	80	79	78	78	82	79	78	83	100	0
NY7332	OD	125	91	51	53	84	115	119	61	55	67	84	132	0	0	0	0	0	0	0	0	0	0	0	0	0	0	M	Black or African American	80	78	78	81	84	80	74	80	86	0
NY7374	OD	92	77	70	74	82	116	129	71	51	76	124	103	0	0	0	0	0	0	0	0	0	0	0	0	0	0	M	Black or African American	78	77	82	76	74	75	77	84	89	0
NY7388	OS	98	66	58	50	81	123	104	45	52	54	90	129	0	0	0	0	0	0	0	0	0	0	0	0	0	0	M	Black or African American	70	69	75	71	72	68	66	71	79	0
NY7400	OD	126	79	49	55	79	120	101	51	46	58	86	165	0	0	0	0	0	0	0	0	0	0	0	0	0	0	F	Black or African American	83	80	78	82	90	87	83	80	85	0.5
NY7402	OD	75	63	51	52	90	95	79	38	36	52	81	105	0	0	0	0	0	0	0	0	0	0	0	0	0	0	M	Black or African American	64	55	71	68	59	61	60	64	68	0
NY7409	OD	130	75	49	53	122	198	129	52	58	78	144	157	0	0	0	0	0	0	0	0	0	0	0	0	0	0	F	Black or African American	81	77	79	84	83	81	81	77	104	0
NY7418	OD	72	65	46	47	47	49	83	50	49	82	124	67	0	0	0	0	0	0	0	0	0	0	0	0	0	0	F	Black or African American	78	69	86	84	82	76	67	72	65	0.5
NY7431	OD	88	74	70	76	102	128	110	41	34	53	106	125	0	0	0	0	0	0	0	0	0	0	0	0	0	0	F	Black or African American	66	64	62	63	67	69	68	70	84	0.5
NY7445	OD	85	54	47	65	80	92	93	53	44	67	114	100	0	0	0	0	0	0	0	0	0	0	0	0	0	0	M	Black or African American	73	70	75	72	74	72	68	77	75	0
NY7452	OS	132	89	82	64	124	125	103	45	32	48	88	123	0	0	0	0	0	0	0	0	0	0	0	0	0	0	M	White	79	80	81	80	78	78	79	80	88	0.5
NY7467	OD	82	66	45	45	61	80	87	58	51	53	64	105	0	0	0	0	0	0	0	0	0	0	0	0	0	0	M	White	68	63	67	62	72	73	68	63	66	0.5
NY7469	OD	92	97	55	77	108	129	91	60	51	65	91	105	0	0	0	0	0	0	0	0	0	0	0	0	0	0	M	White	83	81	80	85	86	89	82	78	85	0.5
NY7470	OD	121	123	75	76	122	162	161	72	56	82	149	133	0	0	0	0	0	0	0	0	0	0	0	0	0	0	M	Black or African American	90	89	91	93	89	91	87	90	111	0
NY7472	OD	59	74	66	58	60	57	50	36	32	51	66	70	0	0	0	0	0	0	0	0	0	0	0	0	0	0	M	White	59	53	56	64	66	54	55	57	57	0.5
NY7478	OD	93	64	55	50	90	134	142	81	50	66	91	141	0	0	0	0	0	0	0	0	0	0	0	0	0	0	F	Black or African American	80	72	81	79	79	80	76	83	88	0
NY7481	OD	59	52	38	40	53	58	53	39	43	56	67	62	0	0	0	0	0	0	0	0	0	0	0	0	0	0	M	Black or African American	63	51	66	69	73	63	54	53	52	0.5
NY7494	OD	98	78	60	67	88	97	118	65	54	55	64	55	0	0	0	0	0	0	0	0	0	0	0	0	0	0	F	White	75	65	65	79	89	76	75	68	75	0.5
NY7512	OD	135	85	61	73	111	137	99	57	47	66	120	140	0	0	0	0	0	0	0	0	0	0	0	0	0	0	F	Black or African American	72	70	68	75	76	75	72	68	94	0
NY7514	OD	112	78	51	65	105	132	83	41	46	58	94	137	0	0	0	0	0	0	0	0	0	0	0	0	0	0	M	Black or African American	83	80	84	84	89	81	77	83	84	0.5
NY7532	OS	47	46	49	51	48	64	54	45	61	39	63	44	0	0	0	0	0	0	0	0	0	0	0	0	0	0	F	White	51	46	55	48	53	49	51	52	51	0.5
NY7555	OD	80	109	124	170	94	113	130	71	55	84	127	85	0	0	0	0	0	0	0	0	0	0	0	0	0	0	F	White	78	76	74	74	79	81	83	80	104	0
NY7557	OD	62	66	68	71	72	69	55	60	69	57	64	59	0	0	0	0	0	0	0	0	0	0	0	0	0	0	M	Black or African American	70	51	62	78	100	58	56	64	64	0.5
NY7559	OD	108	78	42	55	85	121	77	51	45	63	91	134	0	0	0	0	0	0	0	0	0	0	0	0	0	0	M	Black or African American	76	72	75	77	82	81	71	69	79	0
NY7566	OD	69	72	62	58	82	137	88	39	42	53	53	73	0	0	0	0	0	0	0	0	0	0	0	0	0	0	M	Black or African American	77	69	67	76	81	79	76	84	69	0.5
NY7570	OD	112	77	63	69	92	114	138	63	50	79	153	109	0	0	0	0	0	0	0	0	0	0	0	0	0	0	F	White	74	72	79	76	71	71	71	74	93	0
NY7573	OD	113	85	54	85	83	121	111	47	38	64	109	99	0	0	0	0	0	0	0	0	0	0	0	0	0	0	F	White	77	76	75	77	78	74	79	78	84	0
NY7581	OD	128	140	62	69	125	151	151	68	54	80	131	127	0	0	0	0	0	0	0	0	0	0	0	0	0	0	F	White	87	86	84	87	90	87	86	86	107	0
NY7588	OD	115	80	82	67	105	133	176	84	53	93	130	115	0	0	0	0	0	0	0	0	0	0	0	0	0	0	F	Black or African American	88	88	86	88	87	87	88	89	103	0
NY7590	OD	57	66	66	58	58	58	50	29	33	33	41	72	0	0	0	0	0	0	0	0	0	0	0	0	0	0	F	Black or African American	48	41	47	48	47	44	52	50	52	0.5
NY7602	OD	103	111	65	77	105	143	135	69	51	76	123	144	0	0	0	0	0	0	0	0	0	0	0	0	0	0	F	White	92	87	87	92	95	96	90	89	100	0
NY7614	OD	101	93	48	67	82	114	109	64	44	65	106	114	0	0	0	0	0	0	0	0	0	0	0	0	0	0	F	White	73	73	74	74	72	71	70	77	84	0
NY7615	OD	91	119	50	52	106	163	104	51	43	62	108	130	0	0	0	0	0	0	0	0	0	0	0	0	0	0	M	Black or African American	76	70	75	74	79	76	74	76	90	0.5
NY7617	OD	73	69	50	52	68	91	59	38	27	34	49	83	0	0	0	0	0	0	0	0	0	0	0	0	0	0	M	Black or African American	57	54	56	57	56	58	58	56	58	0.5
NY7629	OS	83	70	70	68	95	59	57	36	40	39	55	92	0	0	0	0	0	0	0	0	0	0	0	0	0	0	F	Black or African American	57	53	57	54	58	55	57	61	64	0.5
NY7635	OD	101	66	49	55	63	66	48	49	52	78	86	110	0	1	0	0	0	0	0	0	1	0	0	0	0	0	M	Black or African American	59	41	66	67	66	63	52	42	68	1
NY7653	OD	59	75	54	51	47	45	61	44	45	65	103	71	0	0	0	0	0	0	0	0	0	0	0	0	0	0	F	Black or African American	68	56	79	74	74	64	57	60	60	0.5
NY7657	OD	128	132	88	109	142	152	134	57	45	73	99	111	0	0	0	0	0	0	0	0	0	0	0	0	0	0	F	Black or African American	86	85	85	87	88	84	86	85	106	0
NY7673	OS	59	54	55	48	44	48	62	47	39	47	45	49	0	0	0	0	0	0	0	0	0	0	0	0	0	0	F	White	65	51	62	70	81	64	59	54	50	0.5
NY7677	OS	95	86	61	65	92	122	122	59	52	78	91	73	0	0	0	0	0	0	0	0	0	0	0	0	0	0	F	White	80	74	73	78	82	83	84	80	83	0.5
NY7678	OD	119	70	44	66	109	128	123	63	39	57	93	122	0	0	0	0	0	0	0	0	0	0	0	0	0	0	M	Black or African American	71	68	67	70	68	72	75	74	86	0
NY7691	OD	86	80	74	81	124	157	82	38	34	56	109	139	0	0	0	0	0	0	0	0	0	0	0	0	0	0	F	Black or African American	78	73	82	80	77	75	75	80	88	0
NY7692	OD	105	79	51	54	96	115	133	75	44	68	128	135	0	0	0	0	0	0	0	0	0	0	0	0	0	0	M	White	79	78	79	78	78	75	83	80	90	0
NY7700	OD	50	53	46	51	44	55	47	51	91	51	54	65	1	1	0	0	0	0	0	0	1	1	0	1	1	0	F	Black or African American	60	50	52	57	65	67	61	56	55	1
NY7709	OS	106	91	52	96	99	133	161	70	58	78	150	116	0	0	0	0	0	0	0	0	0	0	0	0	0	0	F	Black or African American	87	85	86	89	87	87	85	89	101	0
NY7712	OD	163	147	65	84	152	164	149	60	47	82	118	160	0	0	0	0	0	0	0	0	0	0	0	0	0	0	F	White	91	86	88	91	91	89	95	90	116	0
NY7718	OS	81	61	57	72	83	92	118	49	38	37	57	92	0	0	0	0	0	0	0	0	0	0	0	0	0	0	M	Black or African American	61	60	64	61	58	60	61	61	70	0.5
NY7734	OD	57	71	62	60	65	89	46	47	54	43	58	97	0	0	0	0	0	0	0	0	0	0	0	0	0	0	M	Black or African American	59	51	62	58	64	56	53	62	63	0.5
NY7735	OS	117	70	59	61	92	151	161	73	66	90	137	154	0	0	0	0	0	0	0	0	0	0	0	0	0	0	F	Black or African American	81	81	79	81	83	81	80	81	102	0.5
NY7737	OD	59	71	59	61	62	71	63	41	40	43	62	69	0	0	0	0	0	0	0	0	0	0	0	0	0	0	M	Black or African American	58	49	50	51	62	70	57	60	59	0.5
NY7749	OS	55	61	59	51	45	54	49	32	31	40	58	72	0	0	0	0	0	0	0	0	0	0	0	0	0	0	M	Black or African American	47	41	50	48	51	44	44	46	51	0.5
NY7752	OD	139	83	67	70	83	111	133	84	46	60	93	142	0	0	0	0	0	0	0	0	0	0	0	0	0	0	M	Black or African American	75	73	76	74	73	73	75	79	93	0
NY7755	OD	69	57	51	52	73	59	36	40	42	58	85	86	0	0	0	0	0	0	0	0	0	0	0	0	0	0	F	Black or African American	55	42	57	62	63	47	50	49	59	0.5
NY7760	OD	65	71	51	68	79	93	64	56	37	41	89	89	0	0	0	0	0	0	0	0	0	0	0	0	0	0	M	Black or African American	70	61	66	60	67	77	74	74	67	0.5
NY7773	OD	103	84	60	55	127	153	105	41	47	74	127	101	0	0	0	0	0	0	0	0	0	0	0	0	0	0	F	Black or African American	81	76	80	83	83	79	78	81	90	0
NY7774	OD	111	92	70	74	110	154	121	58	56	76	121	114	0	0	0	0	0	0	0	0	0	0	0	0	0	0	F	Black or African American	76	71	72	75	78	77	77	75	96	0.5
NY7778	OD	99	104	69	72	128	153	151	78	65	99	138	126	0	0	0	0	0	0	0	0	0	0	0	0	0	0	F	Black or African American	86	85	84	85	90	88	82	87	107	0
NY7785	OD	70	71	58	54	66	68	62	44	41	49	57	99	0	0	0	0	0	0	0	0	0	0	0	0	0	0	M	Black or African American	64	57	63	68	73	63	57	58	62	0.5
NY7786	OS	129	74	48	93	123	75	69	81	108	87	97	137	0	1	0	0	0	0	0	1	0	0	0	0	0	0	F	Black or African American	87	56	95	104	102	91	68	61	93	1
NY7794	OD	88	75	64	55	66	52	48	55	54	69	86	83	0	0	0	0	0	0	0	0	0	0	0	0	0	0	M	Black or African American	67	49	70	77	72	71	61	53	66	0.5
NY7798	OD	92	80	51	61	71	45	43	55	43	57	83	117	0	0	0	0	0	0	0	0	0	0	0	0	0	0	F	Black or African American	74	65	79	79	80	75	66	63	66	0.5
NY7806	OS	99	85	50	49	127	159	123	54	55	73	101	146	0	0	0	0	0	0	0	0	0	0	0	0	0	0	M	Black or African American	83	82	85	84	83	83	81	80	94	0
NY7825	OS	101	64	62	58	65	99	82	59	52	88	135	104	0	0	0	0	0	0	0	0	0	0	0	0	0	0	M	Black or African American	69	63	73	72	66	72	68	65	81	0.5
NY7829	OD	105	84	55	55	101	133	100	41	37	59	108	119	0	0	0	0	0	0	0	0	0	0	0	0	0	0	M	Black or African American	71	62	64	66	70	74	76	74	83	0
NY7834	OS	89	54	47	47	71	102	67	43	36	55	107	115	0	0	0	0	0	0	0	0	0	0	0	0	0	0	F	Black or African American	61	46	62	54	68	63	60	58	69	0.5
NY7836	OD	108	90	75	63	115	178	163	85	66	85	158	143	0	0	0	0	0	0	0	0	0	0	0	0	0	0	M	Black or African American	84	84	84	82	81	82	85	91	111	0
NY7850	OD	92	83	71	85	108	143	125	55	52	68	118	114	0	0	0	0	0	0	0	0	0	0	0	0	0	0	F	Black or African American	76	68	69	75	79	80	76	78	93	0
NY7851	OD	89	65	55	44	84	99	110	64	48	67	114	169	0	0	0	0	0	0	0	0	0	0	0	0	0	0	M	Black or African American	78	77	77	77	77	79	80	79	84	0
NY7855	OD	92	74	59	56	127	142	122	49	49	66	104	101	0	0	0	0	0	0	0	0	0	0	0	0	0	0	F	Black or African American	77	77	76	76	76	78	79	78	87	0
NY7860	OD	115	111	68	92	164	164	95	55	47	76	110	130	0	0	0	0	0	0	0	0	0	0	0	0	0	0	M	Black or African American	79	78	77	74	78	78	83	82	102	0
NY7861	OS	71	66	49	50	60	84	89	52	37	41	73	114	0	0	0	0	0	0	0	0	0	0	0	0	0	0	F	Black or African American	69	57	60	69	68	75	72	69	66	0.5
NY7867	OS	156	83	54	71	89	124	80	41	42	56	81	166	0	0	0	0	0	0	0	0	0	0	0	0	0	0	F	Black or African American	79	78	77	80	82	81	78	78	87	0.5
NY7868	OD	140	65	61	67	144	172	91	50	47	63	119	169	0	0	0	0	0	0	0	0	0	0	0	0	0	0	M	Black or African American	72	72	72	73	74	71	70	74	99	0
SD1087	OD	65	84	50	62	64	68	41	41	45	55	84	90	0	0	0	0	0	0	0	0	0	0	0	0	0	0	M	White	67	52	70	74	78	67	61	53	62	0.5
SD1156	OS	88	69	56	55	101	134	141	54	42	72	150	136	0	0	0	0	0	0	0	0	0	0	0	0	0	0	M	White	77	73	80	77	75	73	74	82	91	0
SD1241	OD	86	88	57	57	94	144	118	52	37	44	102	149	0	0	0	0	0	0	0	0	0	0	0	0	0	0	M	White	76	75	83	75	73	73	74	79	86	0
SD1361	OS	80	59	55	70	69	92	146	81	68	97	124	134	0	0	0	0	0	0	0	0	0	0	0	0	0	0	M	White	68	60	74	70	69	59	65	73	90	0.5
SD1390	OD	84	58	51	75	69	96	94	58	51	59	69	44	0	0	0	0	0	0	0	0	0	0	0	0	0	0	F	Black or African American	76	66	65	74	79	79	81	81	67	0.5
SD1435	OD	69	62	51	51	63	51	43	53	92	124	151	97	0	1	0	0	0	0	1	1	1	0	0	0	0	0	F	Asian	70	45	80	84	87	70	49	48	76	1
SD1554	OD	65	79	66	69	71	102	46	53	50	68	72	66	1	1	0	0	0	0	0	0	1	0	0	0	1	0	F	White	67	45	73	81	82	71	48	48	67	1
SD1573	OD	68	73	53	54	71	103	117	54	51	70	93	55	0	0	0	0	0	0	0	0	0	0	0	0	0	0	F	White	66	65	68	67	68	66	62	67	72	0
SD1759	OD	83	70	54	52	93	78	59	49	55	79	98	104	0	1	0	0	0	0	0	0	1	0	0	0	0	0	F	White	65	49	71	76	74	68	55	48	73	1
SD1863	OD	100	75	69	72	101	68	52	36	37	51	65	112	0	0	0	0	0	0	0	0	0	0	0	0	0	0	F	Black or African American	66	53	67	71	74	67	62	55	70	0.5
SD1870	OD	99	69	56	76	86	133	110	47	39	60	107	130	0	0	0	0	0	0	0	0	0	0	0	0	0	0	F	White	78	78	77	75	76	77	80	81	85	0
SD1927	OD	76	63	51	50	109	117	54	48	46	59	114	159	0	1	0	0	0	0	0	1	0	0	0	0	0	0	M	White	78	64	80	83	83	85	75	64	79	1
SD1993	OD	57	63	41	46	65	79	60	54	61	33	46	71	0	0	0	0	0	0	0	0	0	0	0	0	0	0	M	White	51	45	55	52	52	47	48	53	56	0.5
SD2165	OS	102	89	54	62	110	134	113	50	44	59	104	127	0	0	0	0	0	0	0	0	0	0	0	0	0	0	F	White	80	80	78	79	81	81	81	80	87	0
SD2173	OS	60	68	62	46	47	87	66	45	38	66	95	99	0	1	0	0	0	0	0	0	1	0	0	0	0	0	F	White	75	52	84	90	94	74	55	54	65	1
SD2175	OD	76	79	66	69	85	143	121	46	37	53	80	134	0	0	0	0	0	0	0	0	0	0	0	0	0	0	M	White	78	75	83	77	77	74	77	83	82	0
SD2201	OD	63	78	61	60	68	92	105	40	32	44	65	89	0	0	0	0	0	0	0	0	0	0	0	0	0	0	M	White	59	58	59	62	59	59	59	58	66	0.5
SD2251	OD	101	77	57	52	90	90	49	54	58	62	82	91	1	1	0	0	0	0	0	0	1	0	0	1	1	0	F	White	77	56	75	88	92	84	63	58	72	1
SD2283	OS	75	59	44	80	88	144	183	81	62	49	67	51	0	0	0	0	0	0	0	0	0	0	0	0	0	0	F	White	76	59	59	67	86	84	78	83	82	0.5
SD2285	OS	90	103	56	58	94	100	79	46	36	37	53	84	0	0	0	0	0	0	0	0	0	0	0	0	0	0	M	White	56	47	53	61	55	54	53	57	70	0.5
SD2318	OD	97	83	63	65	104	142	127	58	41	58	91	128	0	0	0	0	0	0	0	0	0	0	0	0	0	0	F	White	78	76	77	80	81	78	75	75	88	0
SD2335	OS	72	72	55	49	63	99	113	57	102	86	106	82	0	0	0	0	0	0	0	0	0	0	0	0	0	0	M	White	44	21	60	31	55	44	26	45	80	0.5
SD2346	OD	63	58	47	53	62	57	64	89	74	114	103	61	0	0	0	0	0	0	0	0	0	0	0	0	0	0	F	White	74	70	75	74	69	76	73	76	70	0.5
SD2363	OD	115	90	70	80	115	64	69	49	61	103	109	87	0	0	0	0	0	0	0	0	0	0	0	0	0	0	M	Asian	74	62	81	84	80	70	66	64	84	0.5
SD2365	OD	63	42	73	67	51	52	64	61	53	71	116	89	0	1	0	0	0	0	0	0	1	0	0	0	0	0	M	White	69	57	72	72	74	75	66	55	67	1
SD2408	OD	121	76	48	60	103	129	155	70	49	70	131	150	0	0	0	0	0	0	0	0	0	0	0	0	0	0	F	Asian	76	74	72	76	82	77	75	75	97	0
SD2409	OS	87	88	58	53	74	94	128	73	63	117	142	71	0	0	0	0	0	0	0	0	0	0	0	0	0	0	M	White	70	67	72	71	71	65	65	75	87	0
SD2483	OS	99	60	48	59	79	122	85	47	41	51	91	136	0	0	0	0	0	0	0	0	0	0	0	0	0	0	M	White	63	56	58	58	68	67	65	61	76	0.5
SD2563	OS	106	69	55	63	77	99	112	67	65	86	122	113	0	0	0	0	0	0	0	0	0	0	0	0	0	0	M	White	78	73	75	73	101	72	72	76	86	0
SD2588	OD	96	71	58	56	81	61	49	45	57	54	63	109	0	1	0	0	0	0	0	1	1	0	0	0	0	0	M	White	71	57	63	74	92	79	61	57	67	1
SD2601	OS	66	61	67	65	65	74	116	79	50	82	77	50	0	0	0	0	0	0	0	0	0	0	0	0	0	0	F	White	74	69	74	77	77	75	72	69	71	0.5
SD2620	OD	122	96	74	65	83	137	96	64	70	67	84	96	0	0	0	0	0	0	0	0	0	0	0	0	0	0	F	Black or African American	80	78	77	81	83	81	79	80	88	0
SD2626	OD	116	92	59	81	93	124	111	38	32	52	90	137	0	0	0	0	0	0	0	0	0	0	0	0	0	0	M	Black or African American	76	75	80	77	76	73	73	77	86	0
SD2628	OD	82	94	72	68	98	123	153	57	41	64	125	118	0	0	0	0	0	0	0	0	0	0	0	0	0	0	F	Black or African American	77	75	75	77	78	77	79	76	91	0
SD2632	OD	87	79	61	53	98	147	113	47	42	79	142	114	1	1	0	0	0	0	0	1	0	0	0	0	0	1	F	Black or African American	75	68	76	82	75	80	72	66	88	1
SD2645	OD	93	88	65	71	89	79	133	63	52	78	66	75	1	1	0	0	0	0	0	1	0	0	0	0	0	1	F	White	87	81	79	86	92	91	88	87	79	1
SD2646	OS	131	68	44	50	70	78	100	59	41	61	89	120	0	0	0	0	0	0	0	0	0	0	0	0	0	0	F	Black or African American	76	76	77	81	77	74	74	76	76	0
SD2647	OD	103	65	48	65	72	86	83	46	53	74	117	123	1	1	0	0	0	0	0	1	0	0	0	0	1	0	F	Black or African American	73	70	73	77	76	68	72	71	78	1
SD3000	OD	88	85	72	62	77	112	94	50	49	68	117	101	0	0	0	0	0	0	0	0	0	0	0	0	0	0	M	Black or African American	79	75	82	78	81	75	74	82	81	0
SD3005	OS	78	79	70	70	75	62	74	36	29	46	72	98	0	0	0	0	0	0	0	0	0	0	0	0	0	0	M	Black or African American	63	62	66	63	63	61	62	62	66	0.5
SD3033	OS	106	86	68	96	93	129	129	58	46	71	128	139	0	0	0	0	0	0	0	0	0	0	0	0	0	0	F	Black or African American	80	70	79	79	83	79	81	78	96	0
SD3043	OD	118	92	53	77	160	128	101	49	39	64	75	122	0	0	0	0	0	0	0	0	0	0	0	0	0	0	F	Black or African American	86	78	78	87	85	88	89	86	90	0.5
SD3063	OD	115	83	73	64	111	138	93	51	45	64	115	145	0	0	0	0	0	0	0	0	0	0	0	0	0	0	M	Black or African American	73	74	72	70	74	74	74	75	91	0
SD3079	OS	91	61	38	54	92	121	113	63	44	76	150	111	0	0	0	0	0	0	0	0	0	0	0	0	0	0	M	White	79	79	78	79	80	79	77	79	84	0
SD3086	OD	118	114	67	69	120	170	141	65	52	79	118	148	0	0	0	0	0	0	0	0	0	0	0	0	0	0	F	Black or African American	80	79	80	82	79	80	79	81	105	0.5
SD3102	OD	121	101	48	70	148	174	103	46	48	54	79	137	0	0	0	0	0	0	0	0	0	0	0	0	0	0	F	Black or African American	81	76	78	82	84	85	81	78	94	0.5
SD3141	OD	108	78	55	59	138	163	140	53	50	76	139	159	0	0	0	0	0	0	0	0	0	0	0	0	0	0	M	Black or African American	84	82	81	86	83	85	84	84	102	0.5
SD3210	OS	101	83	59	85	94	114	137	50	44	74	130	129	0	0	0	0	0	0	0	0	0	0	0	0	0	0	F	White	82	73	81	87	84	75	79	83	92	0
SD3227	OD	86	99	74	73	74	87	93	64	53	73	95	103	0	0	0	0	0	0	0	0	0	0	0	0	0	0	F	Black or African American	70	69	71	72	71	70	69	68	81	0
SD3228	OS	85	65	61	56	75	97	131	66	52	70	118	125	0	0	0	0	0	0	0	0	0	0	0	0	0	0	M	Black or African American	82	77	84	78	77	84	82	85	83	0.5
SD3244	OD	149	112	63	75	157	179	116	47	42	69	111	145	0	0	0	0	0	0	0	0	0	0	0	0	0	0	F	Black or African American	96	90	93	102	97	97	97	92	105	0
SD3257	OD	73	73	70	55	76	62	44	45	70	65	62	83	0	1	0	0	0	0	0	1	1	0	0	0	0	0	M	Black or African American	71	59	78	78	85	65	60	60	65	1
SD3261	OD	92	86	63	77	131	131	103	53	46	65	84	139	0	0	0	0	0	0	0	0	0	0	0	0	0	0	F	Black or African American	76	72	76	80	80	80	70	73	89	0
SD3267	OD	67	66	57	55	53	58	45	32	32	38	77	63	0	0	0	0	0	0	0	0	0	0	0	0	0	0	F	Black or African American	61	54	62	56	66	60	57	63	54	0.5
SD3268	OD	91	80	49	49	70	103	110	59	47	80	156	95	0	0	0	0	0	0	0	0	0	0	0	0	0	0	F	Black or African American	82	79	79	85	86	80	78	82	82	0
SD3271	OD	72	75	53	80	74	83	83	64	50	50	91	81	0	0	0	0	0	0	0	0	0	0	0	0	0	0	F	Black or African American	37	20	33	36	32	41	30	52	71	0.5
SD3278	OD	52	67	51	54	51	43	47	38	40	34	42	61	0	0	0	0	0	0	0	0	0	0	0	0	0	0	M	Black or African American	45	38	50	44	43	41	44	48	48	0.5
SD3287	OD	74	60	56	84	73	88	74	48	56	62	115	141	1	1	0	0	0	0	0	0	1	0	0	0	1	0	F	Black or African American	62	44	53	72	80	64	54	49	78	1
SD3294	OD	114	104	71	70	97	133	152	74	53	79	123	143	0	0	0	0	0	0	0	0	0	0	0	0	0	0	M	Black or African American	82	75	79	83	81	79	86	86	101	0
SD3298	OD	107	68	53	65	94	110	142	78	47	64	107	137	0	0	0	0	0	0	0	0	0	0	0	0	0	0	M	Black or African American	71	58	59	67	68	76	80	78	89	0
SD3299	OD	156	124	68	75	143	156	106	48	41	58	78	137	0	0	0	0	0	0	0	0	0	0	0	0	0	0	F	Black or African American	80	78	77	80	82	80	80	81	99	0
SD3372	OS	94	83	64	69	91	121	121	55	44	70	131	78	0	0	0	0	0	0	0	0	0	0	0	0	0	0	M	Black or African American	74	74	75	73	72	72	72	79	85	0.5
SD3389	OD	78	72	62	65	65	113	92	38	31	42	91	86	0	0	0	0	0	0	0	0	0	0	0	0	0	0	M	Black or African American	67	63	66	62	62	65	71	75	70	0
SD3390	OD	101	83	65	67	87	107	132	64	55	81	109	82	0	0	0	0	0	0	0	0	0	0	0	0	0	0	F	Black or African American	74	67	72	75	75	76	72	74	86	0
SD3431	OD	103	88	75	61	91	147	127	50	44	60	109	130	0	0	0	0	0	0	0	0	0	0	0	0	0	0	M	Black or African American	75	73	73	75	76	76	73	78	91	0
SD3448	OD	98	68	68	63	79	103	79	39	32	48	73	114	0	0	0	0	0	0	0	0	0	0	0	0	0	0	F	Black or African American	64	60	67	67	65	64	60	63	72	0
SD3463	OD	107	100	75	64	84	146	129	52	47	65	86	89	0	0	0	0	0	0	0	0	0	0	0	0	0	0	F	Black or African American	71	53	63	77	73	71	76	67	87	0.5
SD3464	OS	67	52	46	48	61	124	81	32	39	41	62	76	1	1	0	0	0	0	0	0	1	1	0	0	1	0	F	Black or African American	69	63	65	66	72	68	69	75	61	1
SD3527	OS	83	60	55	60	60	72	81	50	41	46	68	114	0	0	0	0	0	0	0	0	0	0	0	0	0	0	M	Black or African American	59	53	65	56	58	56	57	60	66	0.5
SD3531	OD	124	112	65	70	130	176	158	82	59	74	118	177	0	0	0	0	0	0	0	0	0	0	0	0	0	0	M	Black or African American	81	76	80	81	84	84	81	78	112	0
SD3578	OD	109	78	47	57	134	167	116	58	51	80	140	102	0	0	0	0	0	0	0	0	0	0	0	0	0	0	F	White	80	80	77	79	81	82	82	81	95	0
SD3587	OD	96	77	67	67	99	126	113	60	50	56	84	118	0	0	0	0	0	0	0	0	0	0	0	0	0	0	F	Black or African American	72	68	75	70	70	71	71	77	84	0.5
SD3662	OD	95	115	97	80	116	152	101	60	49	76	117	118	0	0	0	0	0	0	0	0	0	0	0	0	0	0	M	White	76	72	76	77	76	73	73	81	98	0
SD3664	OD	122	97	68	77	97	141	176	73	49	74	120	144	0	0	0	0	0	0	0	0	0	0	0	0	0	0	F	Black or African American	93	92	91	95	96	92	91	92	103	0
SD3679	OD	78	65	64	70	63	75	84	31	28	32	51	91	0	0	0	0	0	0	0	0	0	0	0	0	0	0	M	Black or African American	54	44	55	55	49	51	56	59	61	0.5
SD3683	OS	70	60	55	47	48	76	58	37	34	29	42	71	0	0	0	0	0	0	0	0	0	0	0	0	0	0	M	Black or African American	62	54	55	55	67	70	61	61	52	0.5
SD3710	OD	101	89	66	81	116	144	153	68	53	111	175	103	0	0	0	0	0	0	0	0	0	0	0	0	0	0	F	Asian	81	79	83	84	84	82	77	78	105	0
SD3744	OD	97	88	81	65	61	119	125	58	38	59	110	148	0	0	0	0	0	0	0	0	0	0	0	0	0	0	F	White	84	82	85	84	85	82	81	86	88	0
SD3748	OD	138	85	55	79	111	151	117	70	48	73	113	141	0	0	0	0	0	0	0	0	0	0	0	0	0	0	F	White	83	81	81	84	86	83	81	84	98	0
SD3761	OD	47	59	55	54	69	111	117	58	44	73	108	70	0	0	0	0	0	0	0	0	0	0	0	0	0	0	F	White	75	68	74	74	69	77	79	79	72	0.5
SD3781	OD	145	80	57	45	79	108	85	55	39	51	69	135	0	0	0	0	0	0	0	0	0	0	0	0	0	0	F	White	75	75	76	75	75	73	73	76	79	0
SD3782	OD	107	116	72	74	110	159	107	45	31	53	91	141	0	0	0	0	0	0	0	0	0	0	0	0	0	0	M	White	82	78	84	84	85	80	77	81	92	0
SD3872	OD	98	72	70	59	68	100	89	45	34	56	104	108	0	0	0	0	0	0	0	0	0	0	0	0	0	0	M	White	68	69	69	69	68	66	64	69	75	0
SD3926	OD	95	88	58	76	69	96	153	93	55	98	148	92	0	0	0	0	0	0	0	0	0	0	0	0	0	0	F	White	76	75	75	75	73	76	76	78	94	0
SD3935	OS	54	55	50	49	46	46	46	39	39	35	48	64	1	1	0	0	0	0	0	0	1	0	0	1	1	0	F	Black or African American	56	44	49	58	69	60	53	48	48	1
SD3943	OS	82	93	59	61	96	144	131	64	59	72	140	118	0	0	0	0	0	0	0	0	0	0	0	0	0	0	M	White	78	75	83	79	80	77	75	76	93	0.5
SD3988	OD	98	77	60	71	64	38	105	93	66	95	121	103	0	0	0	0	0	0	0	0	0	0	0	0	0	0	F	White	84	78	83	74	79	83	86	99	83	0.5
SD4004	OS	126	76	53	58	125	131	125	60	62	89	153	111	0	0	0	0	0	0	0	0	0	0	0	0	0	0	F	Black or African American	91	84	89	92	93	92	88	92	97	0
SD4005	OD	118	98	70	76	111	137	120	45	43	74	113	163	0	0	0	0	0	0	0	0	0	0	0	0	0	0	F	Black or African American	88	86	87	89	90	88	85	89	97	0
SD4006	OD	107	97	56	64	83	95	108	53	48	65	111	105	0	0	0	0	0	0	0	0	0	0	0	0	0	0	F	Black or African American	76	73	74	78	83	77	71	74	83	0.5
SD4008	OD	104	81	63	59	102	125	99	43	41	59	94	123	0	0	0	0	0	0	0	0	0	0	0	0	0	0	F	Black or African American	70	68	68	72	73	70	67	71	83	0
SD4016	OD	79	66	61	62	70	49	49	36	42	51	63	50	0	0	0	0	0	0	0	0	0	0	0	0	0	0	M	Japanese	54	45	48	55	56	52	55	57	57	0.5
SD4024	OD	109	64	47	44	60	58	71	51	48	75	145	105	0	1	0	0	0	0	0	1	1	1	0	0	0	0	F	Indian	45	14	26	30	38	68	48	60	73	1
SD4027	OD	50	53	48	53	57	68	62	34	35	52	75	69	0	0	0	0	0	0	0	0	0	0	0	0	0	0	F	White	54	44	63	62	55	47	49	46	55	0.5
SD4067	OS	64	92	85	91	135	155	98	41	45	55	84	100	0	0	0	0	0	0	0	0	0	0	0	0	0	0	F	White	72	66	65	73	74	71	76	75	87	0.5
SD4069	OD	54	58	50	61	71	86	85	40	34	41	69	47	0	0	0	0	0	0	0	0	0	0	0	0	0	0	F	White	48	43	48	45	48	44	46	55	58	0.5
SD4107	OD	67	51	45	46	58	82	162	115	67	95	89	45	0	1	0	0	0	0	0	1	0	0	0	0	0	0	M	Asian	84	75	74	88	89	91	85	77	77	1
SD4130	OD	100	80	57	62	115	99	48	36	40	53	75	112	0	1	0	0	0	0	0	1	0	0	0	0	0	0	F	White	62	51	62	68	72	66	56	48	73	1
SD4136	OD	43	44	51	52	49	36	55	53	53	61	47	43	0	0	0	0	0	0	0	0	0	0	0	0	0	0	M	White	61	54	61	64	62	61	58	60	49	0.5
SD4140	OS	70	70	70	64	65	69	57	64	46	52	81	69	0	0	0	0	0	0	0	0	0	0	0	0	0	0	F	White	70	60	67	79	75	69	68	65	65	0.5
SD4144	OD	110	87	68	79	137	183	224	128	86	126	160	109	0	0	0	0	0	0	0	0	0	0	0	0	0	0	F	White	92	51	102	95	67	99	91	100	125	0.5
SD4145	OD	86	82	55	70	81	103	63	62	50	81	126	107	0	1	0	0	0	0	0	0	1	0	0	0	0	0	F	White	57	34	60	58	53	73	48	48	80	1
SD4155	OS	82	76	62	57	64	50	56	56	52	54	53	66	1	1	0	0	0	0	0	1	1	0	0	0	1	0	M	White	56	49	51	55	58	58	56	55	61	1
SD4158	OD	44	52	47	48	49	45	48	49	39	38	48	55	0	0	0	0	0	0	0	0	0	0	0	0	0	0	F	Not Reported	60	51	52	58	73	70	54	54	47	0.5
SD4159	OD	50	102	73	58	96	79	72	66	42	75	63	27	1	1	0	0	0	0	0	1	0	0	0	0	0	1	M	Black or African American	76	67	68	76	77	82	82	74	67	1
SD4207	OD	95	72	49	56	56	51	61	54	67	53	93	80	0	0	0	0	0	0	0	0	0	0	0	0	0	0	F	White	74	52	70	86	79	80	75	56	66	0.5
SD4222	OS	115	75	68	61	72	108	128	79	54	70	73	111	1	1	0	0	0	0	0	0	1	0	0	0	1	0	F	White	72	53	55	70	80	82	76	68	85	1
SD4223	OD	153	97	65	107	130	157	165	76	48	80	130	164	0	0	0	0	0	0	0	0	0	0	0	0	0	0	F	Black or African American	86	85	85	84	88	86	85	85	114	0
SD4230	OS	72	74	55	48	50	63	58	55	48	67	98	114	0	0	0	0	0	0	0	0	0	0	0	0	0	0	M	Indian	70	59	74	81	76	74	61	57	67	0.5
SD4235	OS	100	59	36	55	107	118	128	53	47	73	118	84	0	0	0	0	0	0	0	0	0	0	0	0	0	0	M	White	82	83	81	82	80	80	82	87	82	0.5
SD4240	OD	68	65	57	54	62	70	73	74	48	66	95	75	0	1	0	0	0	0	0	0	1	0	0	0	0	0	F	White	74	70	74	77	80	74	66	70	67	1
SD4244	OD	76	71	56	48	53	72	58	59	64	70	83	92	0	0	0	0	0	0	0	0	0	0	0	0	0	0	M	White	54	47	55	57	57	49	50	57	67	0.5
SD4247	OS	62	58	46	50	52	106	66	27	28	28	46	65	0	0	0	0	0	0	0	0	0	0	0	0	0	0	F	White	60	54	57	54	64	62	58	65	53	0.5
SD4256	OD	112	80	49	81	71	81	83	64	53	117	138	55	0	1	0	0	0	0	0	0	1	0	0	0	0	0	F	White	83	78	88	79	89	95	74	75	82	1
SD4296	OS	68	62	57	55	59	60	76	65	48	54	76	92	0	1	0	0	0	0	0	0	1	0	0	0	0	0	M	Black or African American	70	64	63	70	74	81	70	62	64	1
SD4344	OS	108	57	48	36	73	73	61	62	53	38	60	103	1	1	0	0	0	0	0	1	1	0	0	0	1	0	M	Asian	68	53	56	60	82	86	66	56	64	1
SD4363	OD	84	65	44	55	77	69	90	110	60	84	133	108	0	0	0	0	0	0	0	0	0	0	0	0	0	0	M	White	81	80	78	79	81	88	82	78	82	0.5
SD4378	OD	85	78	65	57	68	64	41	42	51	63	96	107	1	1	0	0	0	0	0	1	1	0	0	0	1	0	F	Asian	43	25	40	33	30	68	42	46	68	1
